# Supplementary material
Source: Springer Nature journal article supplement (https://www.springermedizin.de/resource/supplementary/12936_2010_1591_MOESM2_ESM.pdf/9542328)

# Chloroquine

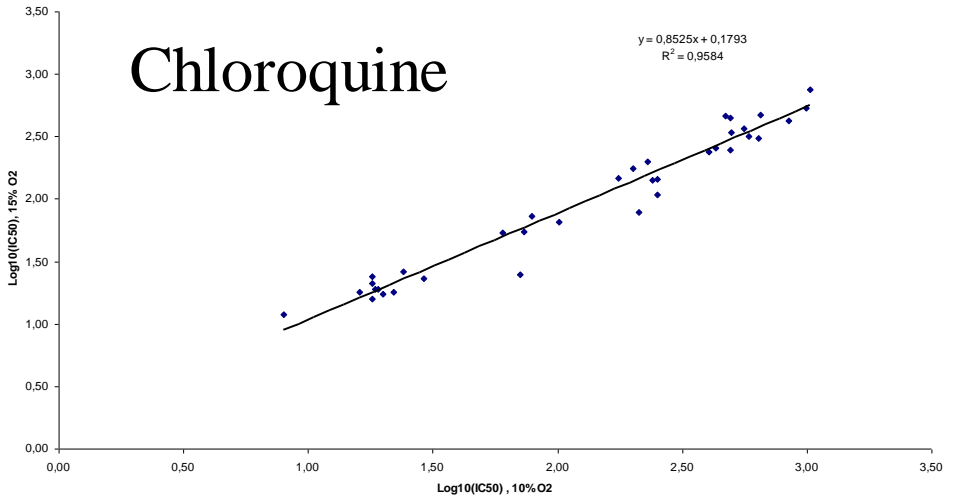

# Quinine

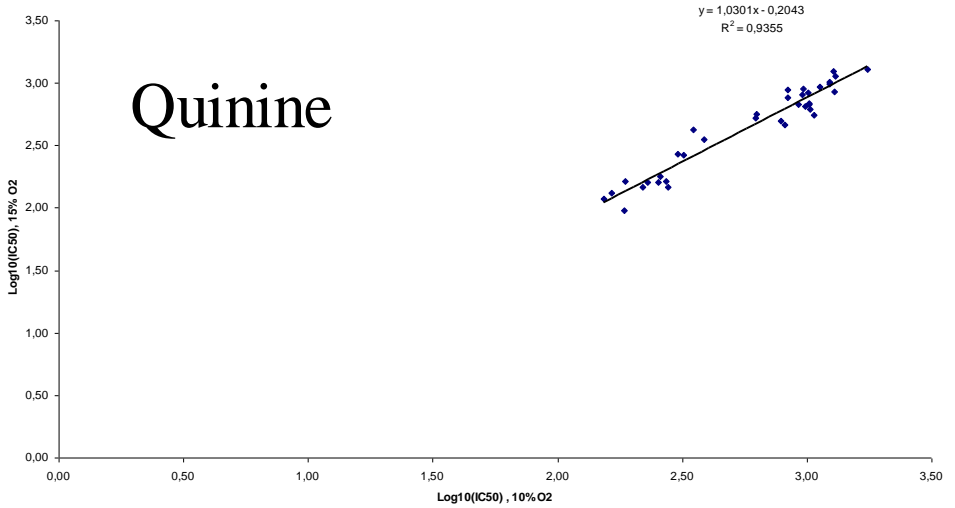

# Mefloquine

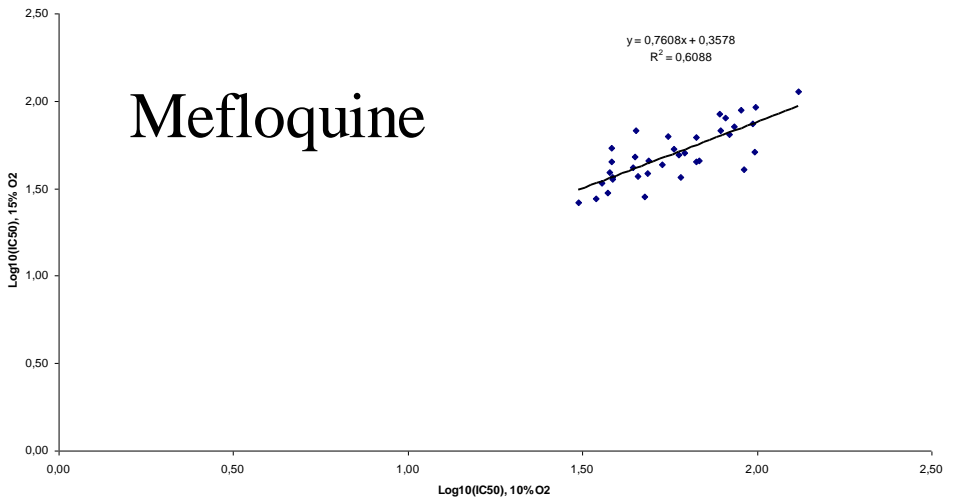

Supplement: MOESM2 [file 9542328]
